# Supplementary material for: Caenorhabditis elegans processes sensory information to choose between freeloading and self-defense strategies
Source: eLife journal article supplement (doi:10.7554/elife.56186), 2020-05-04
Supplement: supp [file elife-56186-supp-v1.zip]

Archive with 21 entries (21 files):
- elife_poa_e56186_Figure_1_figure_supplement_1.pdf
- elife_poa_e56186_Figure_2_figure_supplement_1.pdf
- elife_poa_e56186_Figure_3_figure_supplement_1.pdf
- elife_poa_e56186_Figure_4_figure_supplement_1.pdf
- elife_poa_e56186_Figure_5_figure_supplement_1.pdf
- elife_poa_e56186_Figure_6_figure_supplement_1.pdf
- elife_poa_e56186_Figure_7_figure_supplement_1.pdf
- elife_poa_e56186_Figure_8_figure_supplement_1.pdf
- elife_poa_e56186_Supplementary_file_1.docx
- elife_poa_e56186_Supplementary_file_2.docx
- elife_poa_e56186_Supplementary_file_3.docx
- elife_poa_e56186_Supplementary_file_4.docx
- elife_poa_e56186_Supplementary_file_5.docx
- elife_poa_e56186_Supplementary_file_6.docx
- elife_poa_e56186_Supplementary_file_7.docx
- elife_poa_e56186_Supplementary_file_8.docx
- elife_poa_e56186_Supplementary_file_9.docx
- elife_poa_e56186_Supplementary_file_10.docx
- elife_poa_e56186_Supplementary_file_11.docx
- elife_poa_e56186_Supplementary_file_12.docx
- elife_poa_e56186_Transparent_Reporting_File.docx
