# Supplementary material for: Caenorhabditis elegans processes sensory information to choose between freeloading and self-defense strategies
Source: eLife journal article supplement (doi:10.7554/elife.56186), 2020-05-04
Supplement: supp [file elife-56186-supp-v1.zip › elife_poa_e56186_Supplementary_file_11.docx]

| **Supplementary file 11. PCR genotyping primers and enzymes, and phenotypes used for strain construction.** | | | |
| --- | --- | --- | --- |
|  |  |  |  |
| **Allele** | **phenotype** | **Primers** | **Restriction Enzyme** |
| *daf-3(mgDf90)* | - | AAACGCGTCATGTGGACCAC | - |
| ACCCTCATGCCTACTGTCAG |
| *oyIs84* | fluorescent marker | - | - |
| *daf-1(m40)* | dauer constitutive | GAGACGATCATCCACTTGGTAAG | Tsp45I |
| AAATCTTCCGGATCCAACTCTAC |
| *daf-7(ok3125)* | dauer constitutive | ATCTTCACTCCCGGTGTTTATCT | *-* |
| CTCAGGATTGGAGACTTTGTGAG |
| *mes-1(ok2467)* | sterile | - | *-* |
| *tdc-1(ok914)* | - | AACGGTGCATTTTTCAGGAC | *-* |
| GGACGTTGAGAATGCGAAAT |
| AAATGGTTTACGGGCTTGG |
| ATGGTTGGCCATGTTGAGAT |
| *eat-2(ad1116)* | decreased pumping | GGAGCCACTTAGGACACC | Hpy188I |
| CCACACTATCTTTCTACCAC |
| *tbh-1(ok1196)* | - | AAGCAGGATCAGGAGCACAT | *-* |
| ATGAGAAGTGCCGTTGCTCT |
| CATGTCATTGATGGCTGGAC |
| GAACGCCAGTTGGTTGATTT |
| *daf-2(e1370)* | dauer constitutive | GACGATCCCGAGGTGAGTAT | *-* |
| CAGCGATGGTTGTGATGGAA |
| *daf-16(mu86)* | - | AGAACACCATGGGGGCACTGGAT | *-* |
| GGCGGGAATGAAGCAAGAGCCAA |
| TGACGCTCACCTTGAAAAGGTCAAT |
| GGAACCGATTCGCCAACCCATGA |
| *ins-3(tm3608)* | - | GATCAGCATTGTCACCTGAC | *-* |
| TGGCAACTGATGTCCGGTAT |
| *ins-4(tm3620)* | - | CCGCCCAATCCCTTTAACGT | *-* |
| GATGGCTTGTTGGACGACTG |
| TGGCGCTTGACGCATCAGTC |
| GAGTGCACTGTGTTGTGCAG |
| *ins-5(tm2560)* | - | GGCTCCTTGCGCCATGATGT | *-* |
| ATCCTTGAATGCCCGTGAGT |
| GCTCCTCCCATGTTGGATTG |
| GGTTTCAGGAGGGTGACGGT |
| *ins-6(tm2416)* | - | TTTACCCACCCCTTCGTGAT | *-* |
| TTGTACAAGCCACTGGGATG |
| TCGTGATGCTCCGCCTATTG |
| ACAGAGACTGATATCGGAGT |
| *daf-28(tm2308)* | - | TCCGCCCACTTTGAGCTATA | *-* |
| GCACCCGATCTGACGACACT |
| GGGTTATCACTAGGAAGTTG |
| ACCGAGAGGTAGGGGTAATT |
| *hlh-30(tm1978)* | - | TGTCACCTCGGATAGGAAGCCGG | - |
| TGGCGGGAAGTTCGAAAATTGTTGA |
| GCTGAAATGTTTGCTCAAAAGCGCC |
| *ctl-2(ok1137)* | - | TACCCAGAAGCGTAATCCACAG | *-* |
| CATCTTGTCTGGCGAGAACTCG |
