# Supplementary figures and images for: Caenorhabditis elegans processes sensory information to choose between freeloading and self-defense strategies
Source: eLife journal article supplement (doi:10.7554/elife.56186), 2020-05-04

Figure 3—figure supplement 1

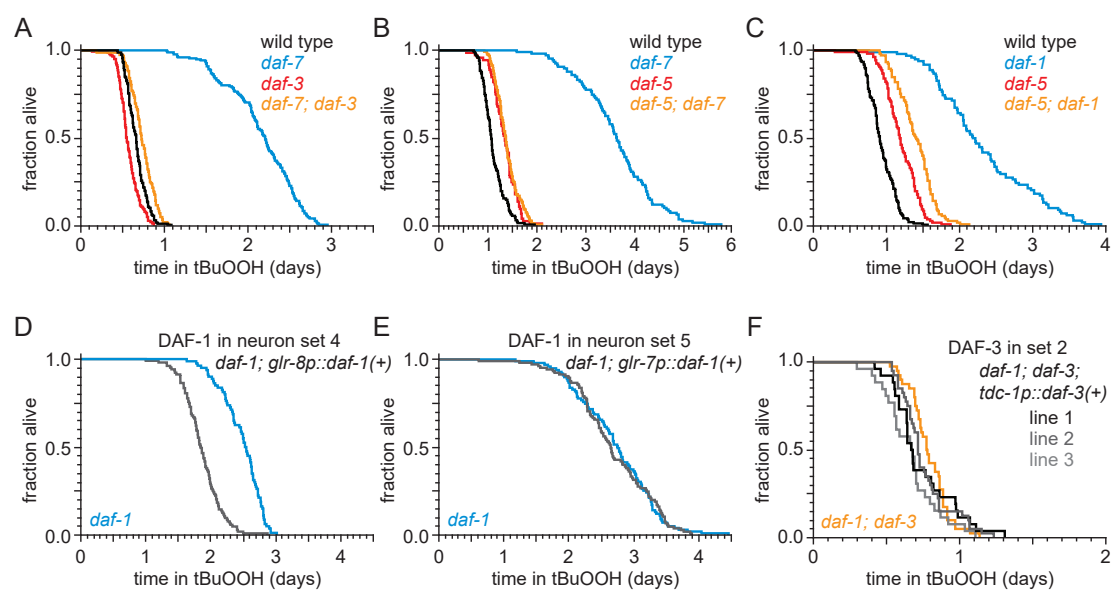

Supplement: supp [file elife-56186-supp-v1.zip]

Figure 4—figure supplement 1

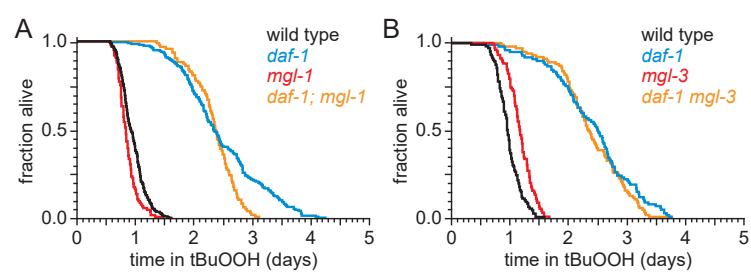

Supplement: supp [file elife-56186-supp-v1.zip]

Figure 7—figure supplement 1

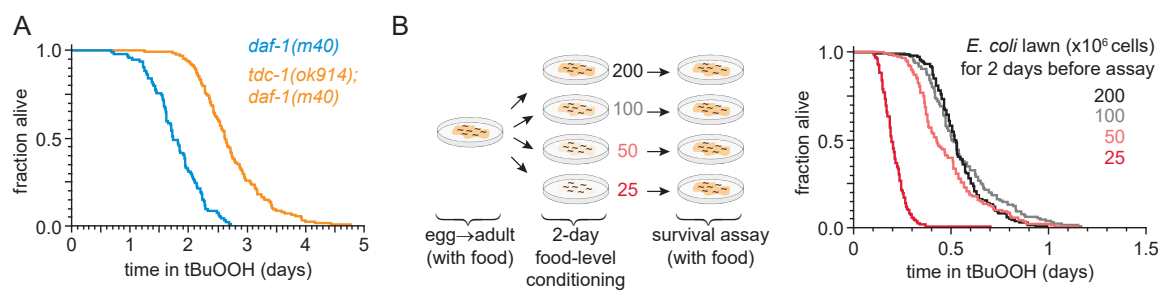

Supplement: supp [file elife-56186-supp-v1.zip]

Figure 2—figure supplement 1

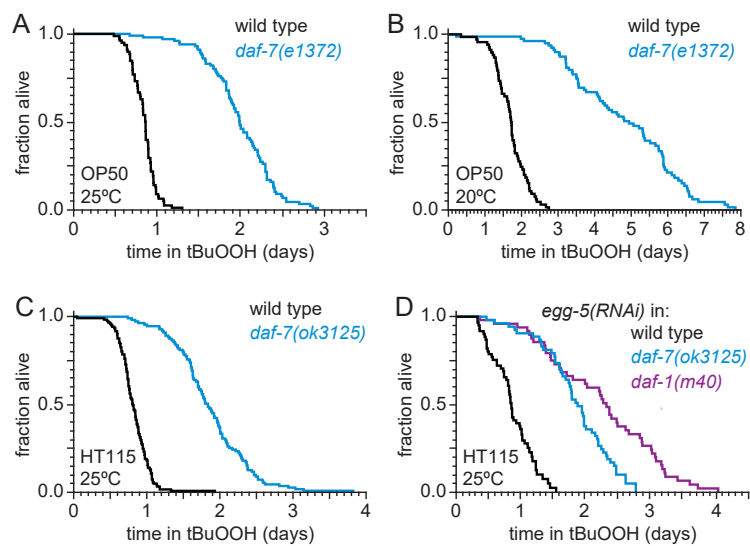

Supplement: supp [file elife-56186-supp-v1.zip]

Figure 8—figure supplement 1

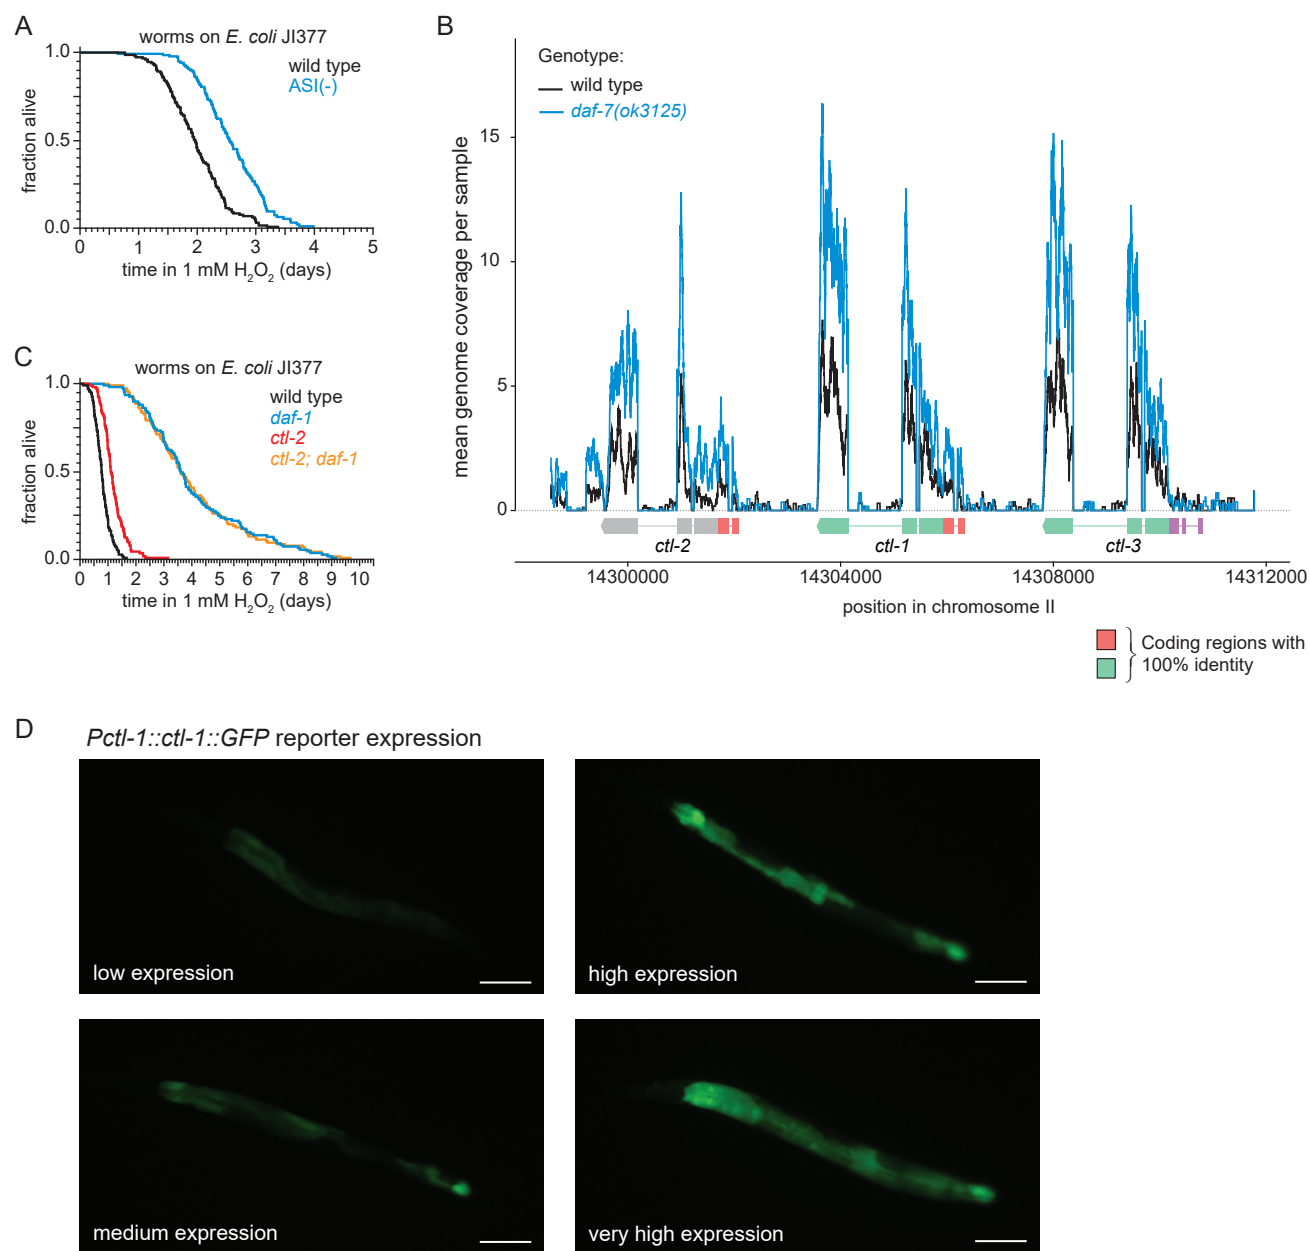

Supplement: supp [file elife-56186-supp-v1.zip]

Figure 6—figure supplement 1

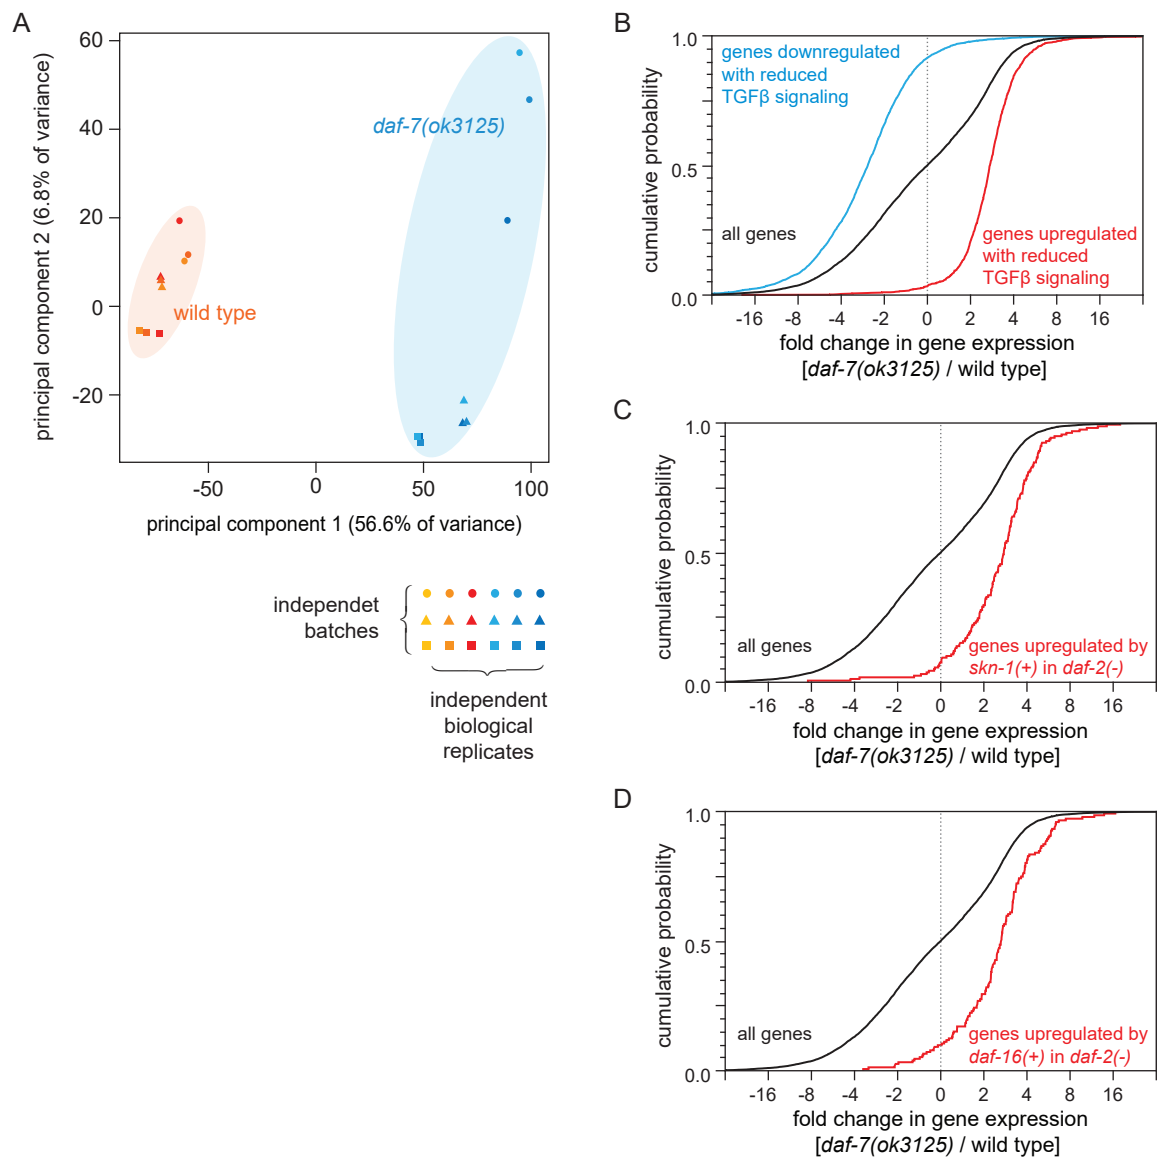

Supplement: supp [file elife-56186-supp-v1.zip]

Figure 5—figure supplement 1

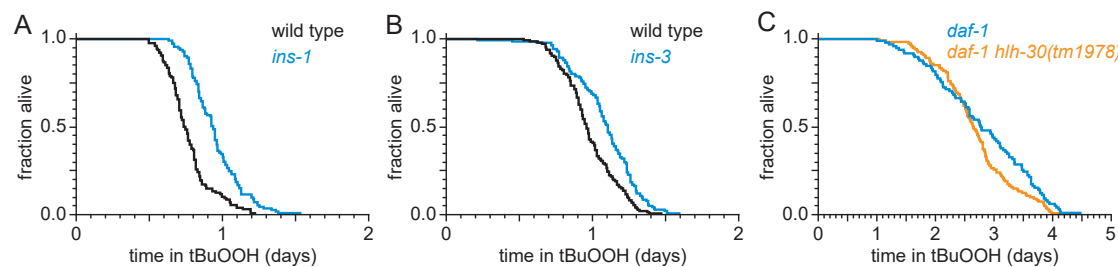

Supplement: supp [file elife-56186-supp-v1.zip]

Figure 1—figure supplement 1

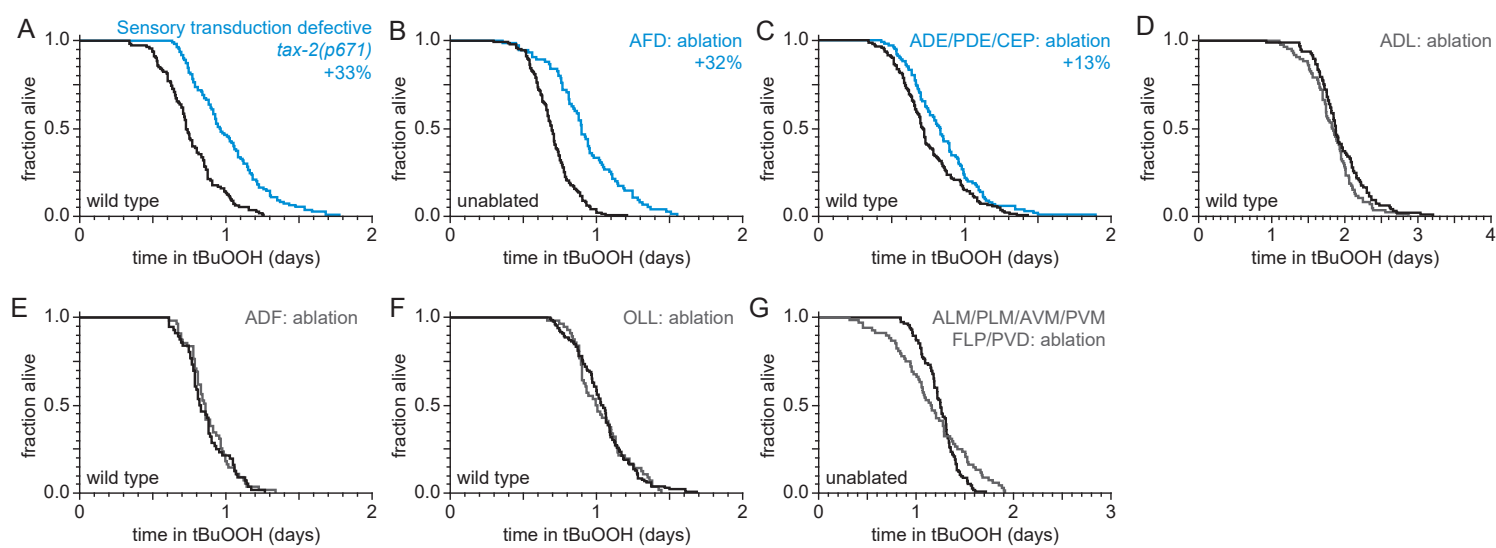

Supplement: supp [file elife-56186-supp-v1.zip › elife_poa_e56186_Figure_1_figure_supplement_1.pdf]
